# Supplementary material for: Inhibition of mRNA maturation in trypanosomes causes the formation of novel foci at the nuclear periphery containing cytoplasmic regulators of mRNA fate
Source: PubMed Central journal article supplement — J Cell Sci. 2012 Jun 15;125(12):2896–909. doi: 10.1242/jcs.099275 (PMC3434824; doi:10.1242/jcs.099275), 2012-06-15
Supplement: supp_125.12.2896_JCS099275Figs.pdf [file supp_125.12.2896_JCS099275Figs.pdf]

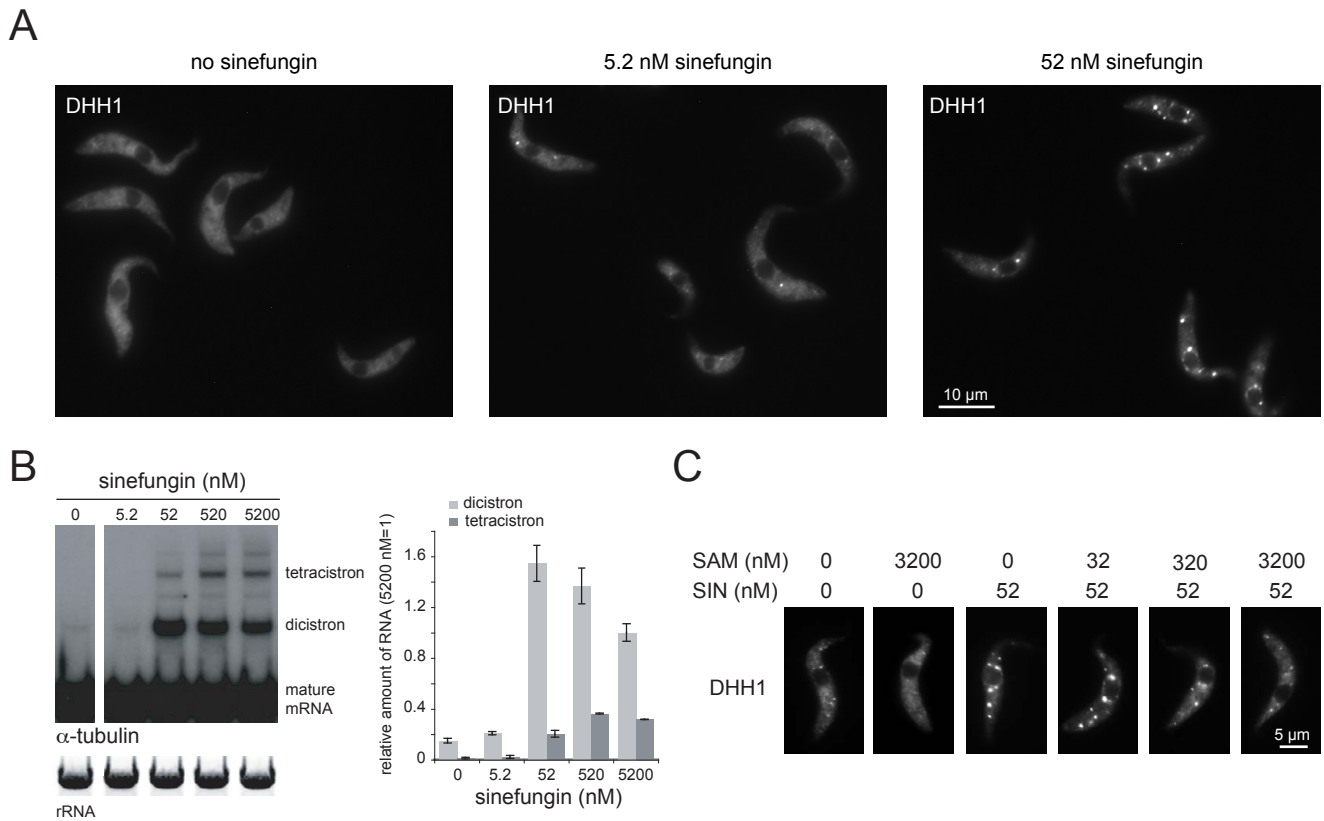

**Figure S1**

**Determination of the threshold concentration(s) of sinefungin required for eYFP-DHH1 localisation to NPGs and inhibition of tubulin mRNA maturation.**

(A) Cells were incubated for 60 min and images collected.

(B) Northern blot analysis of incompletely processed tubulin mRNAs from cells treated in the same manner as (A); dicistronic and tetracistronic tubulin mRNAs from three experiments were quantified.

(C) Co-incubation with excess S-adenosyl methionine prevents the sinefungin-induced formation of NPGs. Incubations were for 60 minutes.

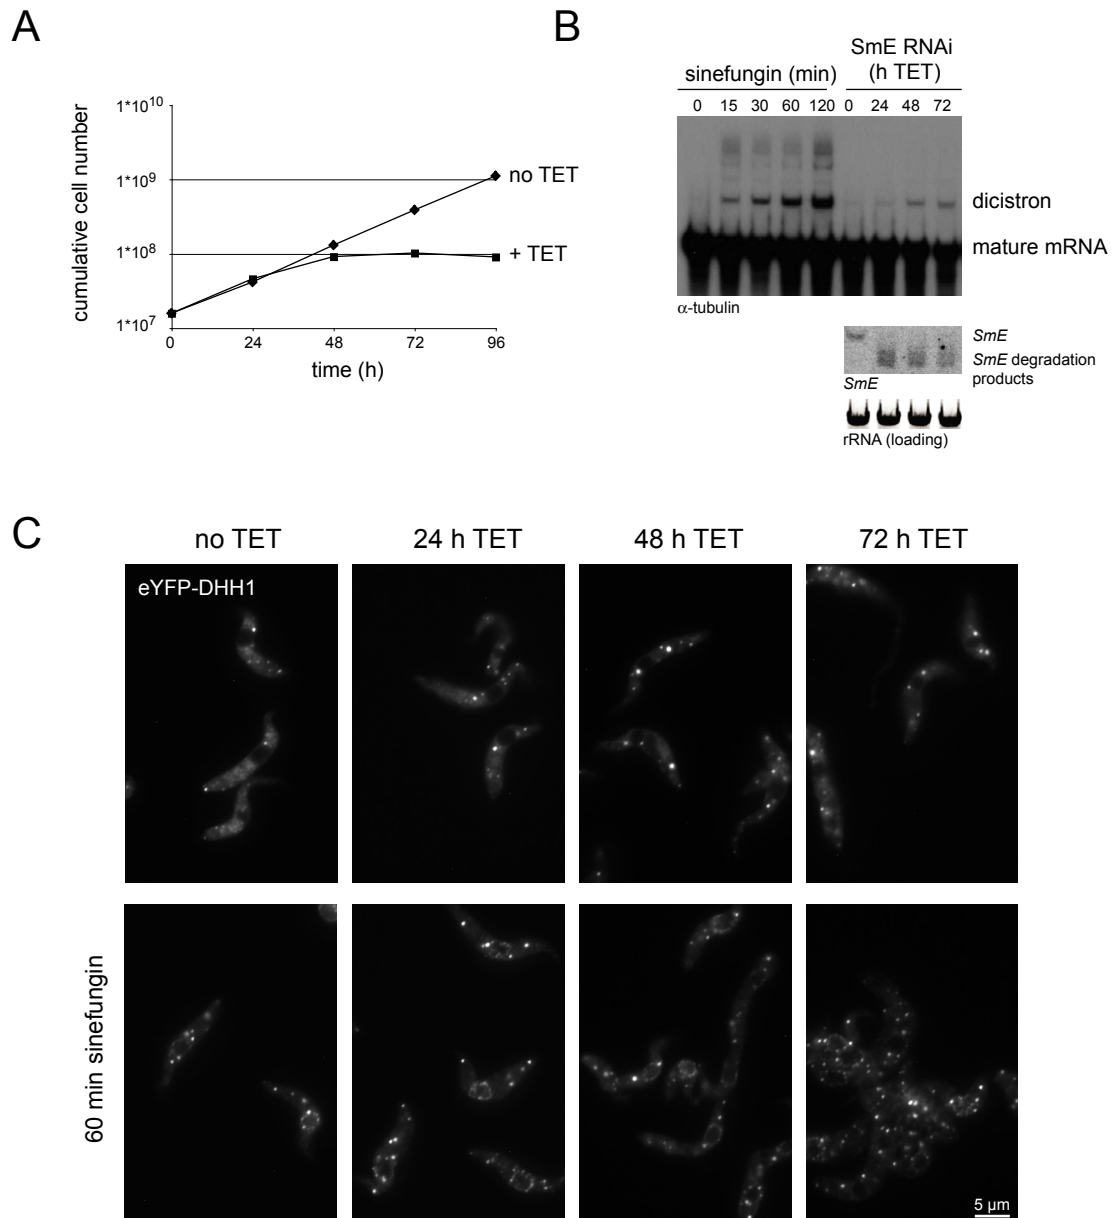

**Figure S2**

**RNAi depletion of SmE does not cause the formation of NPGs**

**SmE protein was depleted in cells constitutively expressing eYFP-DHH1.**

**(A)** SmE RNAi resulted in reduced proliferation.

**(B)** Northern blot analysis of incompletely processed tubulin mRNAs (top) and *SmE* mRNA (bottom) over a time course of SmE RNAi compared with the effect of sinefungin (top). Note that SmE RNAi resulted in less accumulation of incompletely processed tubulin mRNA than sinefungin.

**(C)** Localisation of eYFP-DHH1 over a time course of SmE RNAi and the effect of incubation with sinefungin. Note that SmE RNAi caused an increase in cytoplasmic P-bodies, but no formation of NPGs. Moreover, when SmE depleted cells were treated with sinefungin, NPGs still formed in the majority of the cells.

FIGURE S3

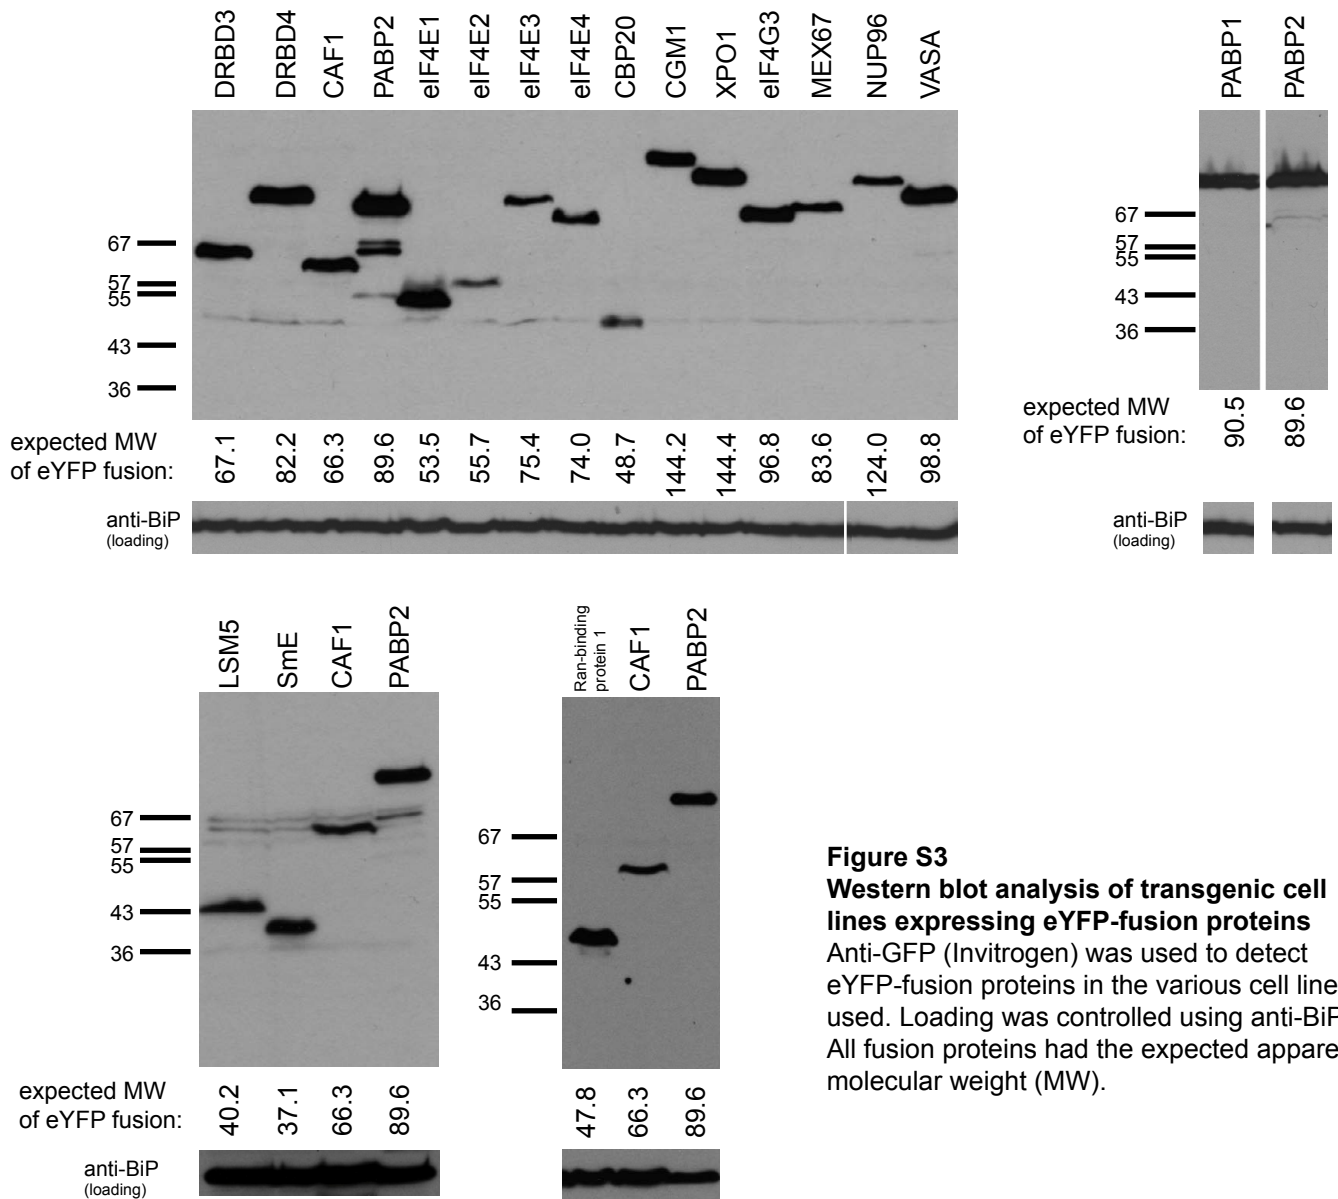

A

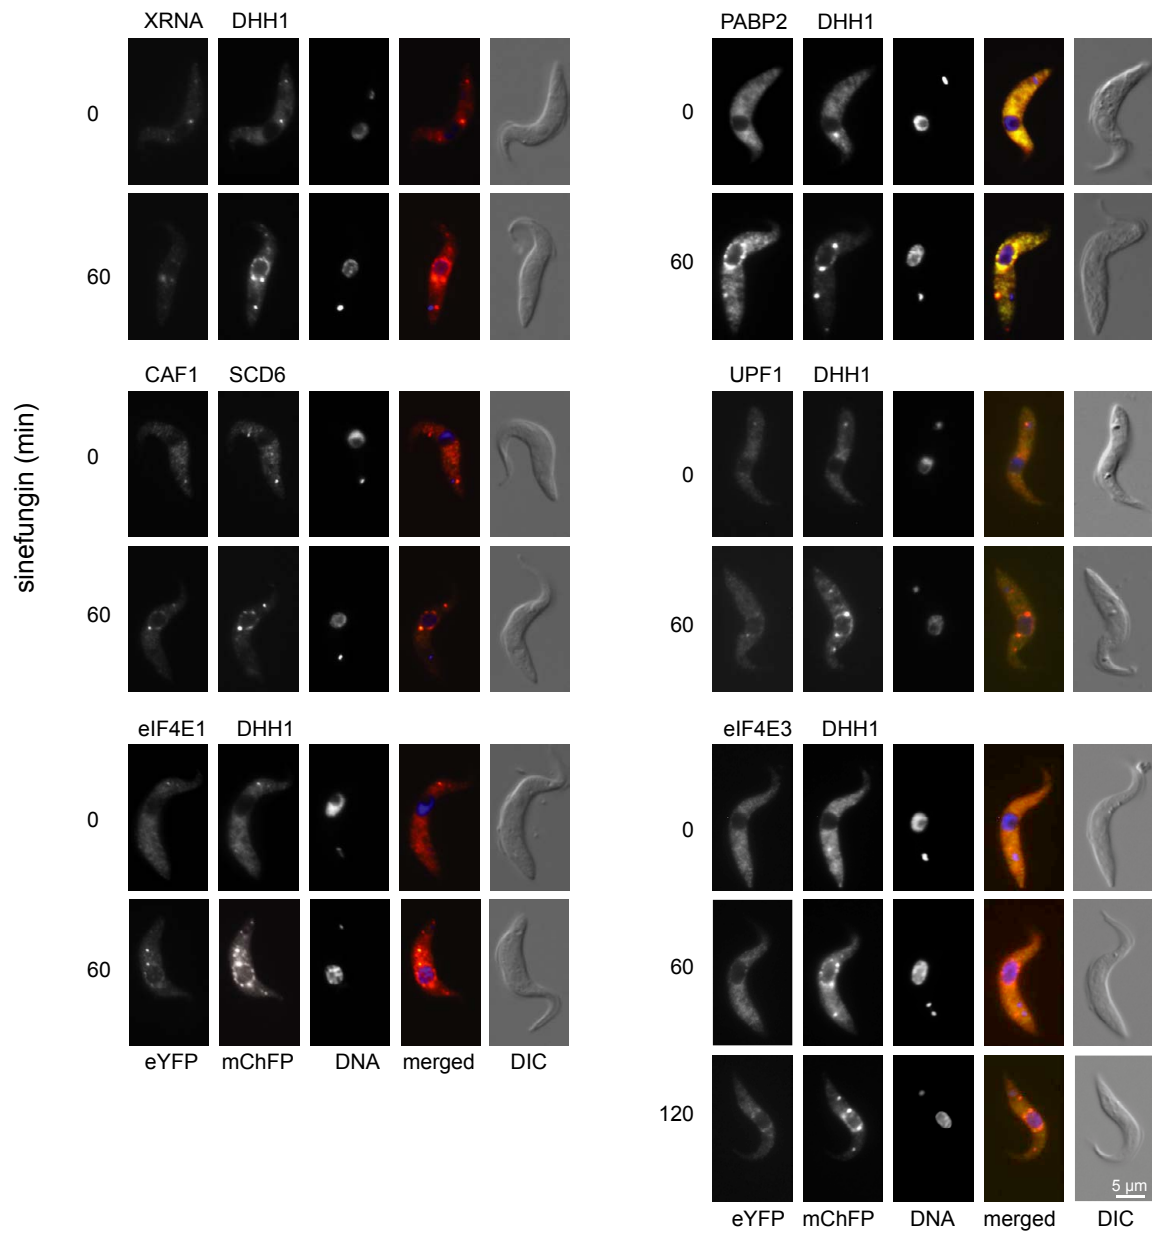

B

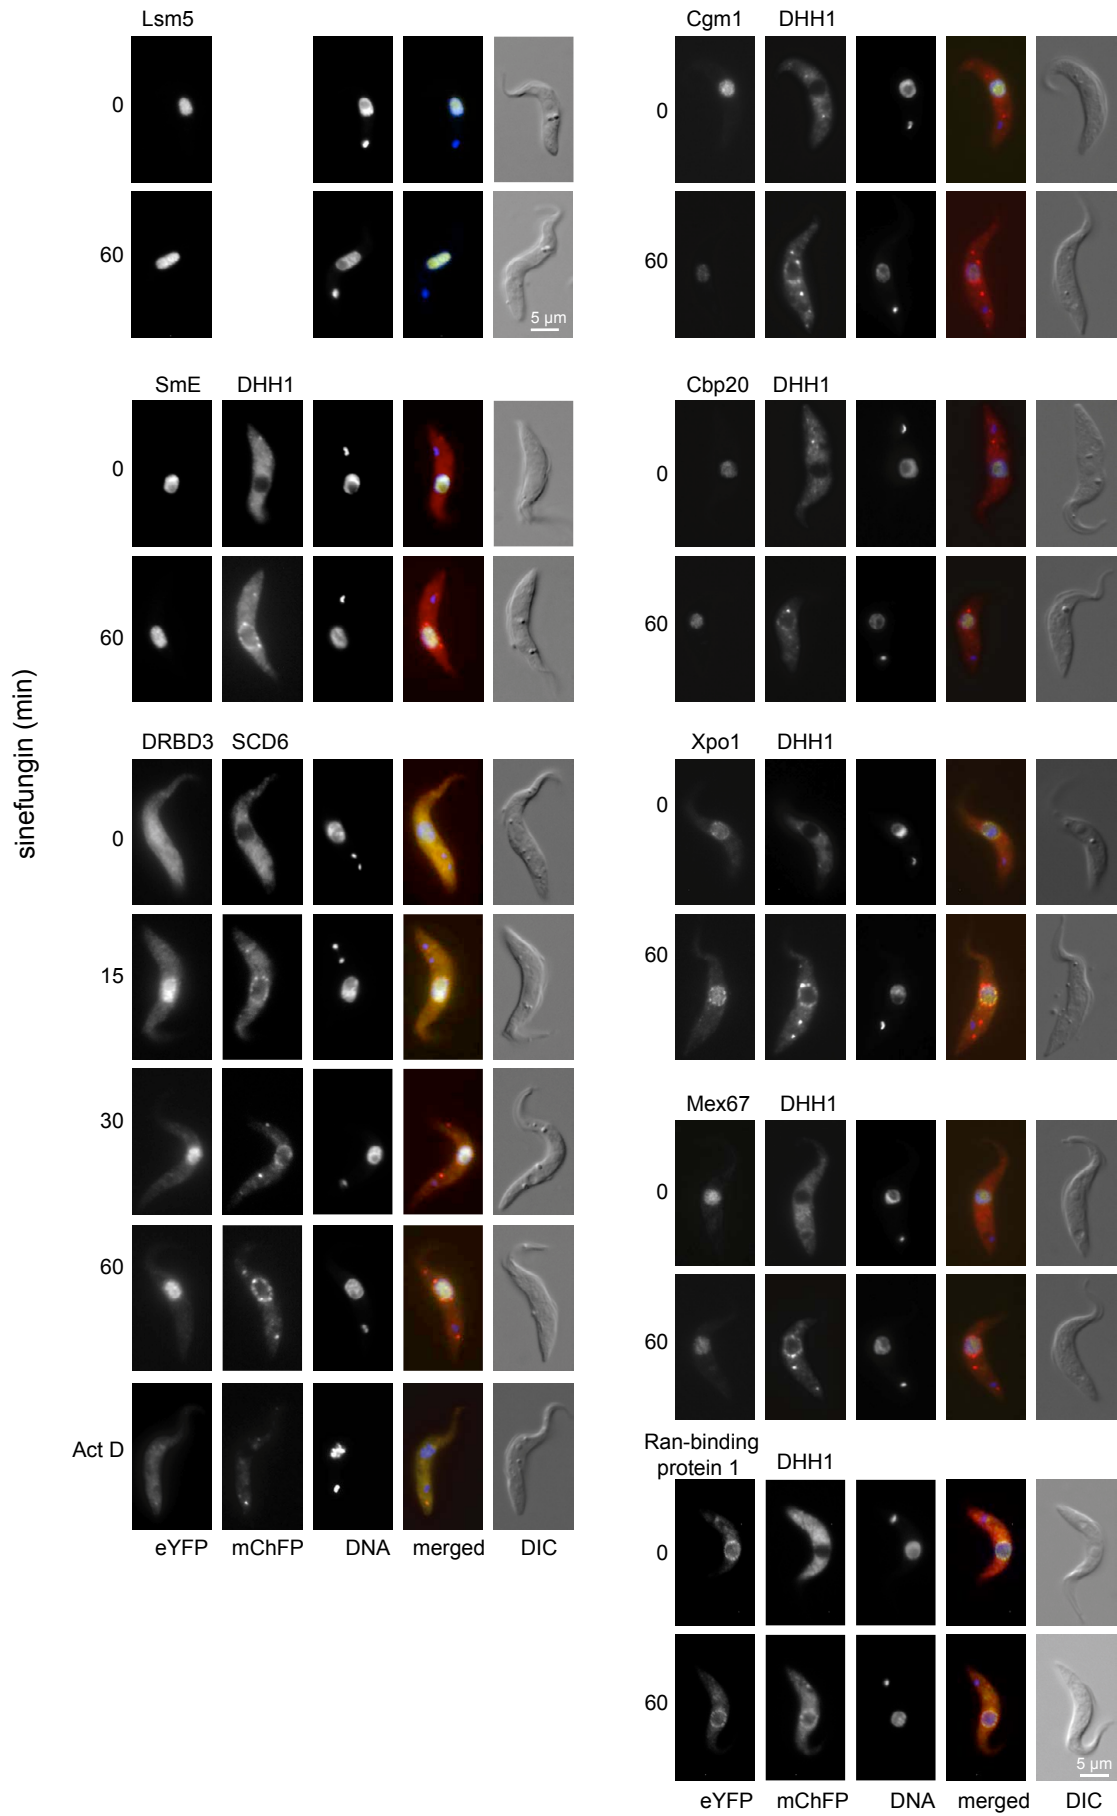

B (continued)

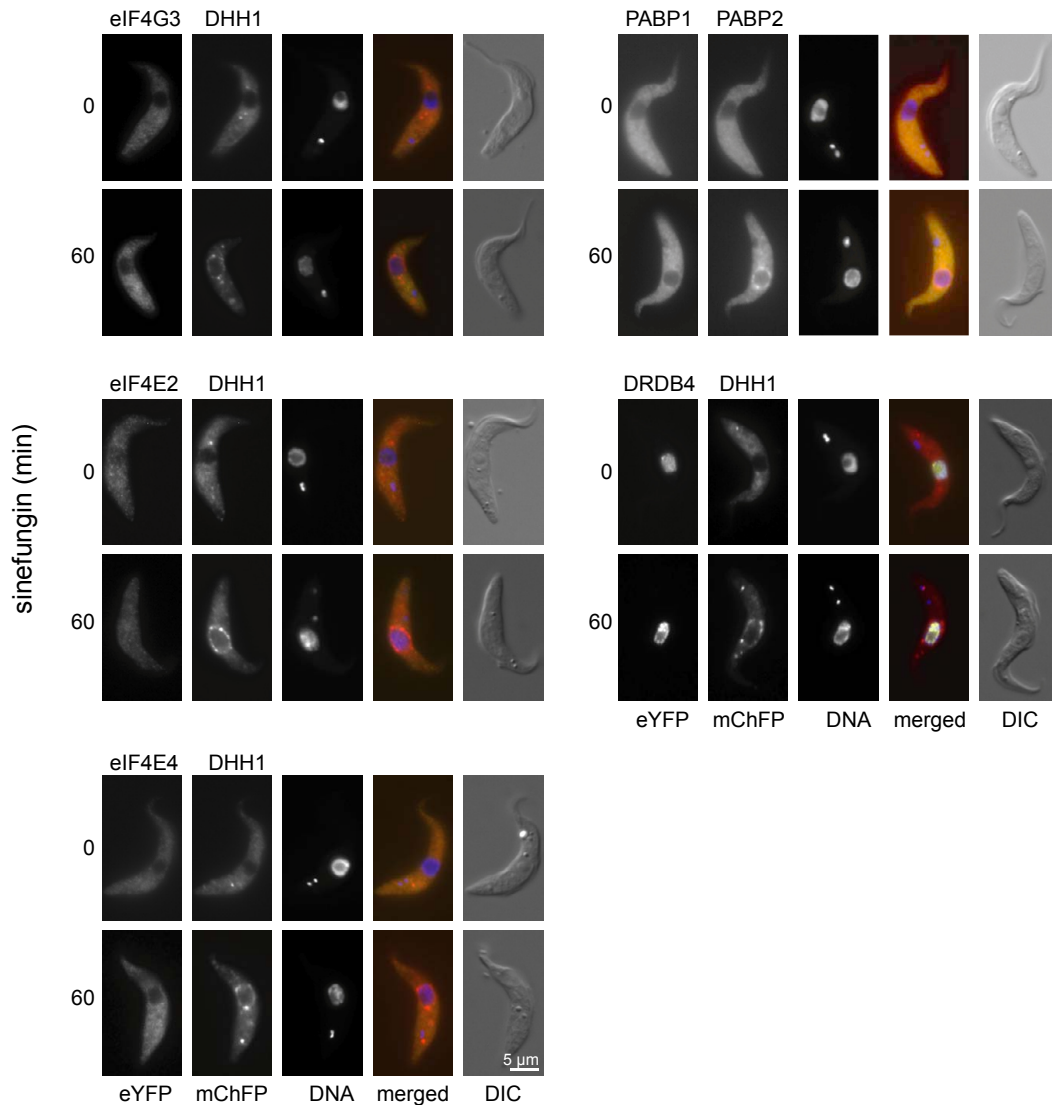

**Figure S4**

**Screen for proteins localizing to NPGs**

eYFP-fusions of proteins involved in various aspects of RNA metabolism were co-expressed with an NPG marker protein, either mChFP-DHH1, SCD6-mChFP or PABP2-mChFP. All transgenes, except LSM5-eYFP, were expressed after modification of one endogenous allele. LSM5-eYFP was expressed as a tetracycline-inducible transgene using a pDEX377 derivative (Kelly et al., 2007) in cells without an NPG marker.

Each protein was tested for localisation to NPGs after incubation with sinefungin for 60 min. Cells expressing DRBD3-eYFP were also treated with actinomycin D for 60 min.

**A)** Proteins that localize to the NPGs

**B)** Proteins that do not localize to the NPGs

```

VASA          MSDDDWDEPIVDTRGARRGGDWSDDEDTAKFSFGAEAGDVGSGGGEGGGYQGGNRDVFGR 60
Tb927.10.14550 MLTVCLSFFFTRALLVCFKSLRLSPPCAPILLPLTK-----KKRYLK 42
*   . : . : . : . : . : . : . : . : . : . : . : . : . : . : . : . : . : . :
VASA          IGGRGGGGAGGYRGGNRDGGGFHGGRRRGERDFRGGGEGGFRGGQGSRGGQGSRGGQGG 120
Tb927.10.14550 MHG-MNFGQGGHQFPNPNANPWAPAFGEAGHQVGYQYQYRPREGFDGFSRGRGE 101
: * . * * *: * : . : . : * * . : * : . : * * . * * . * . * : * : *
VASA          FRGGEGGFGRGLYENEDGDERRGLDREERRGGERGRGLDREERRGGERGERGDGGFARRRR 180
Tb927.10.14550 FIRRNVPYQG-----ETSGHGYHREEP 123
*   :   : * * * * * * * * * * * * * * * * * * * * * * * * * * * * * *
VASA          NEDDINNNNNIVEDVERKREFYIPPEPSNDAIEIFSSGIASGIHFSKYNNIPVKVTGSDV 240
Tb927.10.14550 ADEDIFKDH-----TPGINFDQHGEVNMTIPNDI 153
: * * * * * * * * * * * * * * * * * * * * * * * * * * * * * *
                        DEAD
VASA          PQPIQHFTSADLRDIIIDNVNKSGYKIPTPIQKCSIPVISSGRDLMACAQTGSGKTAAFL 300
Tb927.10.14550 AP-VLSFSEMMVPVLEENVKRCGYTPVQSLGIPTALNRDMACAQTGSGKTASYL 212
.   : * . : . : : * * * * * * * * * * * * * * * * * * * * * * * * * * *
VASA          LPILSKLEDP-----HELELGRPVIVVSPTRELAIQIFNEARKFAFESYLKIGIVGY 354
Tb927.10.14550 IPAINEILLNISNRPPYSPGSHSPQALLAPTRELSLQIYGEARKFTYHTPVRCVVVY 272
: * : . : * : . : . : * * . : * * * * * * * * * * * * * * * * * * * * *
VASA          GTSFRHQNECITRGCHVVIATPGRLLDFVDRTIFEDTRFVVLDEADRMLDMGFSEDMR 414
Tb927.10.14550 GADPRHQVHELSRGCKLLVATPGRLMDMFSRGYVRFSEIRFLILDEADRMLDMGFEPQIR 332
* . . * * . : * * * * * * * * * * * * * * * * * * * * * * * * * * * * *
VASA          RIMT---HVTMRPEHQTLMFSATFPEEIQRMAGEFLKNYVFVAIGIVGACSDVKQTIY 470
Tb927.10.14550 MIVQGPDSDMPRAGQRQTLLYSATFPVEIQRLAREFMCRHSFLQVRGSTENITQDVR 392
* :   . :   : * * * * * * * * * * * * * * * * * * * * * * * * * * *
                        HELICASE C
VASA          EVNKYAKRSKLIEILS-EQADGTIVFVETKRGADFLASFLSEKEFPPTSIHGDRLQSQRE 529
Tb927.10.14550 WIEDPDKRQALLTLRENEGKLVLVFVEKRDADYLERFLRNSELACVSIHGDRVQRERE 452
: . . * * . * : * : . : . : * * * * * * * * * * * * * * * * * * * * *
VASA          QALRDFKNGSMKVLIATSVASRGLDIKNIKHVINYDMPSKIDDYVHRIGRTGRVGNNGRA 589
Tb927.10.14550 EALRLFKSGACQVLVATDVASRGLDIPNVGVVIQDMPSNIDDYVHRIGRTGRAKVGVA 512
: * * * * * * : * * * * * * * * * * * * * * * * * * * * * * * * * * *
VASA          TSFFDPEKDRAIAADLVKILEGSGQTVPDFLRTCG-----AGGDGGYS----- 632
Tb927.10.14550 ISFFN-EKNRNIVDDLIPLLNETNQVISPEVRALAKRPNNNNNNNNRRGGGGGYRGFGR 571
* * * * * * * * * * * * * * * * * * * * * * * * * * * * * *
VASA          -----NQNFGGVDVRGRNYVG----- 649
Tb927.10.14550 GNSGGFGMGGRGGGGGGGYRGGGGNSGGFGMSNVFGNSGGFGMGGRGGGGG 631
. * * * * * * * * * * * * *
VASA          -----DATNVEEEEQWD----- 661
Tb927.10.14550 GGGFSGGGFGASGGNMRGMFGGGGGPTM 660
. * : . : . : . :

```

**Figure S5**  
**Amino acid sequence alignment of *Drosophila* VASA with its closest *T. brucei* homologue (Tb927.10.14550)**

Conserved Pfam motifs are coloured. RRG motifs are coloured in blue and FG motifs in pink. Both *Drosophila* VASA and the homologous *C. elegans* GLH proteins 1, 2 and 4 possess a glycine-rich domain, but in VASA this domain contains RGG motifs, an established RNA-binding domain (Kiledjian and Dreyfuss, 1992) and in GLH proteins it contains FGG motifs, which interact with nuclear pore components (Suntharalingam and Went, 2003). The *T. brucei* homologue has seven RGG and one FGG motif in its glycine-rich domain at its C-terminus indicating closer homology to *Drosophila* VASA than to *C. elegans* GLH. The alignment was performed using ClustalW with default settings.

Kiledjian, M. and Dreyfuss, G. (1992). Primary structure and binding activity of the hnRNP U protein: binding RNA through RGG box. *EMBO J* 11, 2655-64.

Suntharalingam, M. and Went, S. R. (2003). Peering through the pore: nuclear pore complex structure, assembly, and function. *Dev Cell* 4, 775-89.

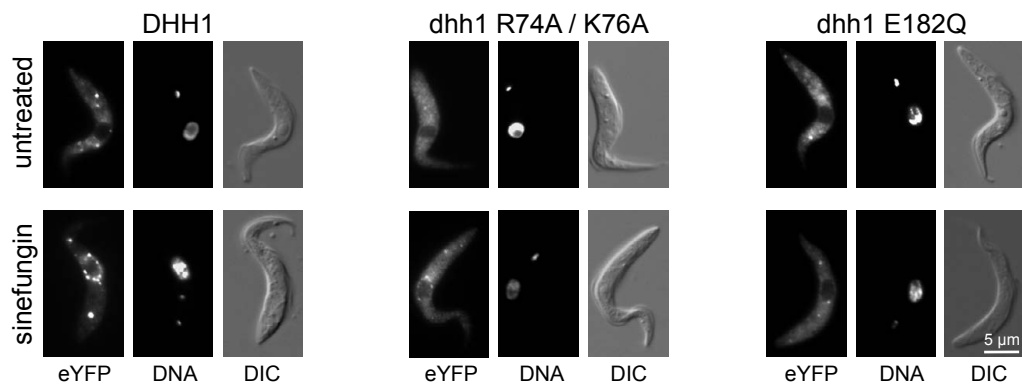

**Figure S6**

**Dhh1 mutant proteins have reduced localization to NPGs**

DHH1 mutant proteins impaired in RNA binding (dhh1 R74A/K76A) or ATPase activity (dhh1 E182Q) have reduced localization to P-bodies (Kramer et al., 2010b). Localization of the mutant proteins to NPGs was determined after incubation with sinefungin for 60 min.



A

mChFP-DHH1

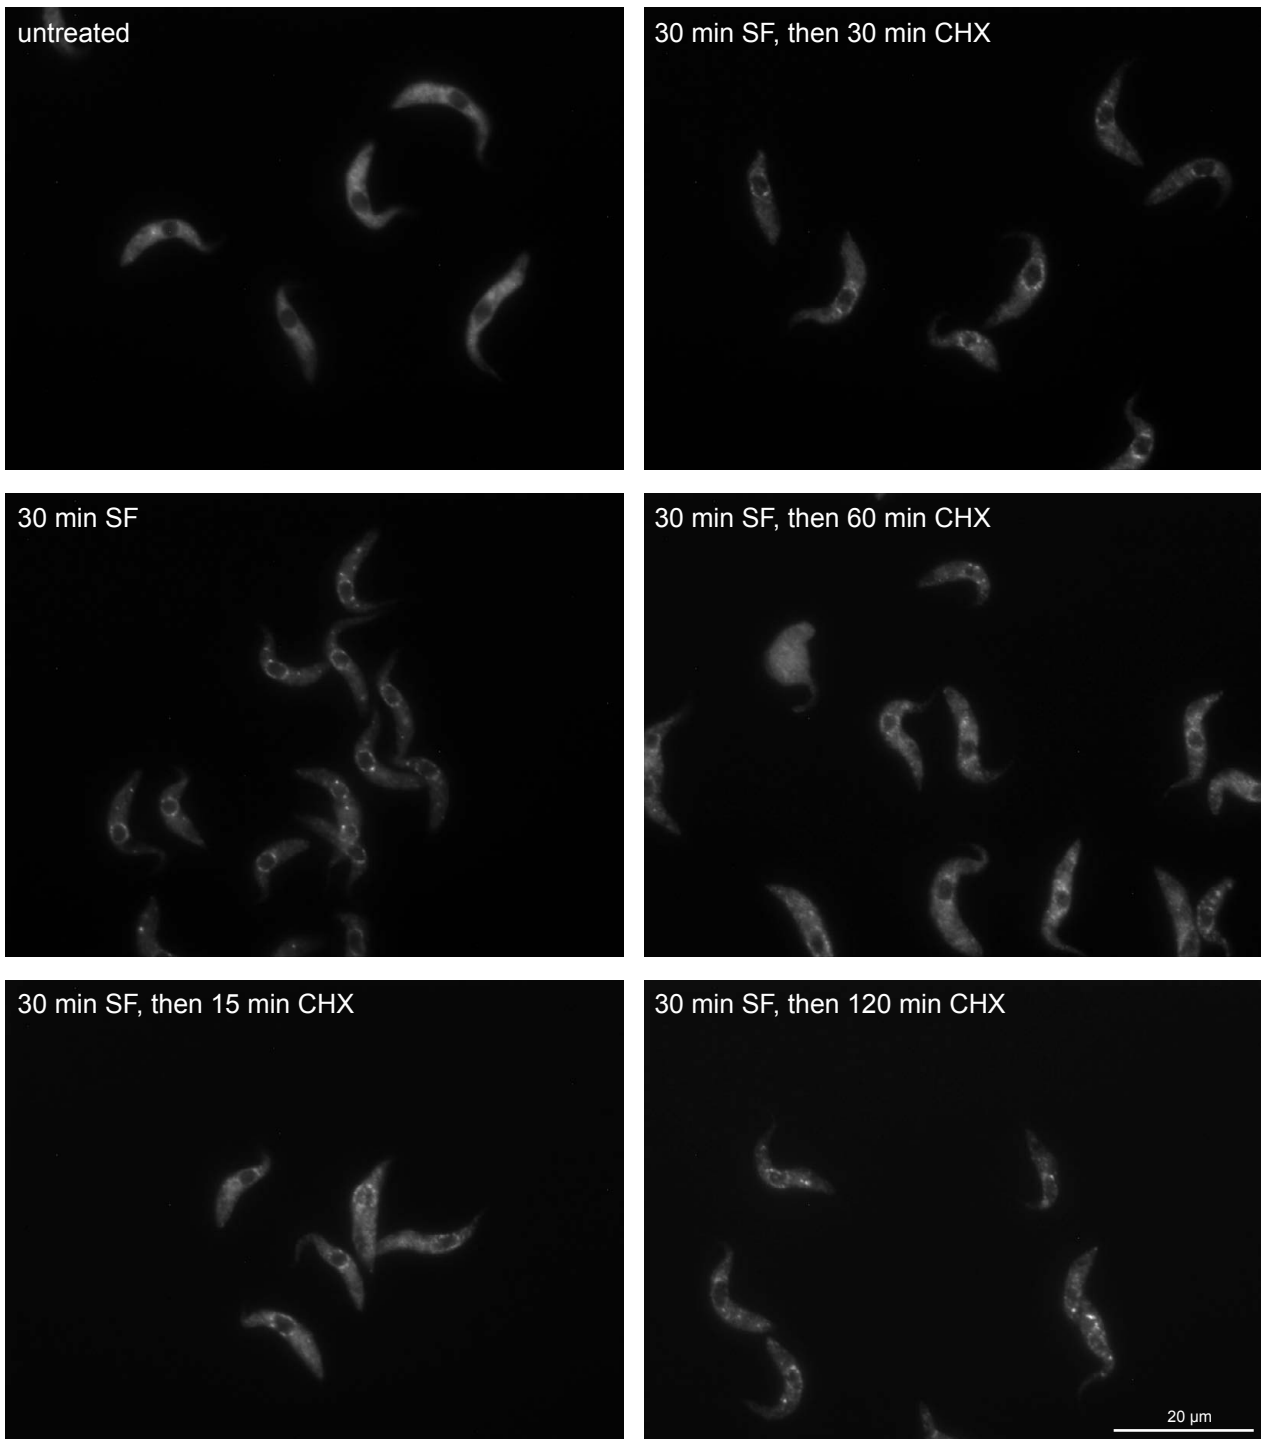

B

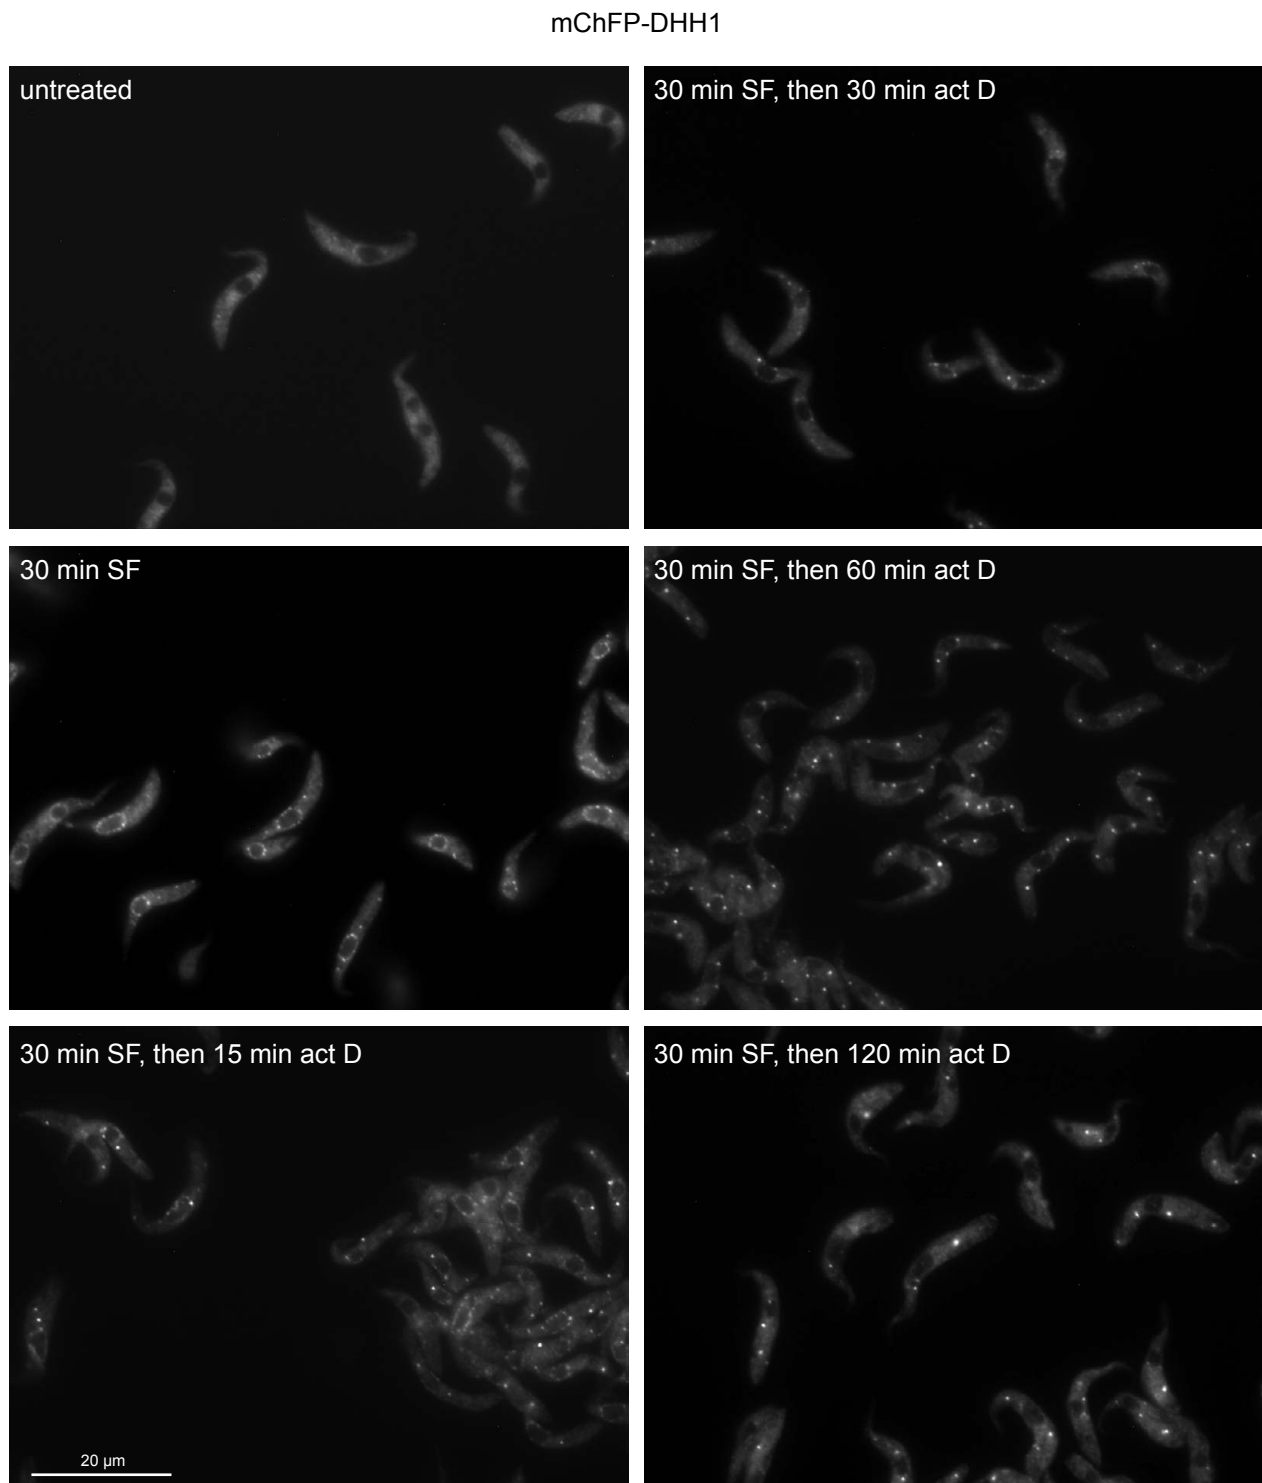**Figure S7****NPGs are stable in the presence of cycloheximide but not actinomycin D**

Cells expressing mChFP-DHH1 were incubated with sinefungin (SF) for 30 minutes to induce the formation of NPGs. The effect of **(A)** cycloheximide and **(B)** actinomycin D (act D) on the NPGs was determined over a time-course.

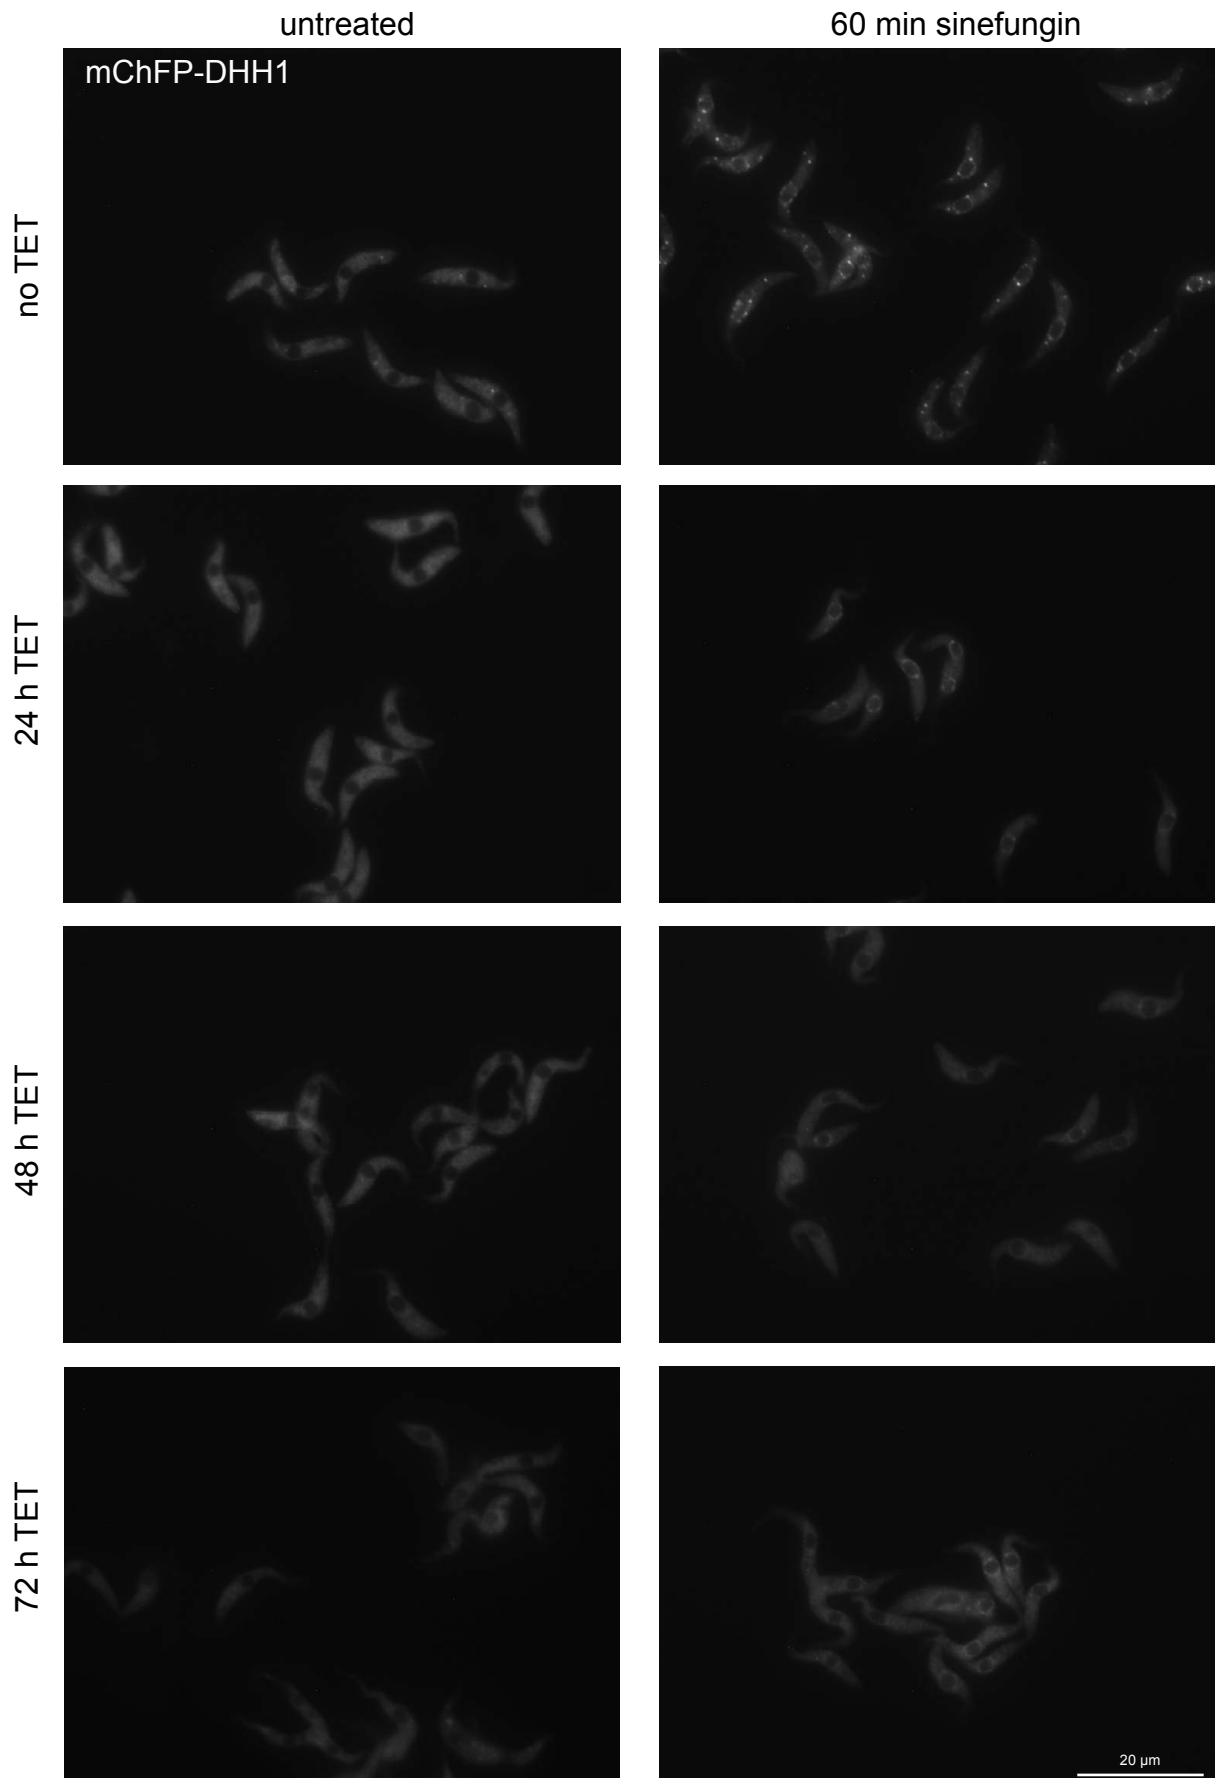

**Figure S8**

**SCD6 RNAi depletion prevents P-body formation, but not the formation of NPGs**

SCD6 was depleted in cells constitutively expressing mChFP-DHH1, a marker for both NPGs and P-bodies. The localization of mChFP-DHH1 protein to P-bodies and NPGs was monitored over a time-course of induction of SCD6 RNAi (compare with Figure 5).

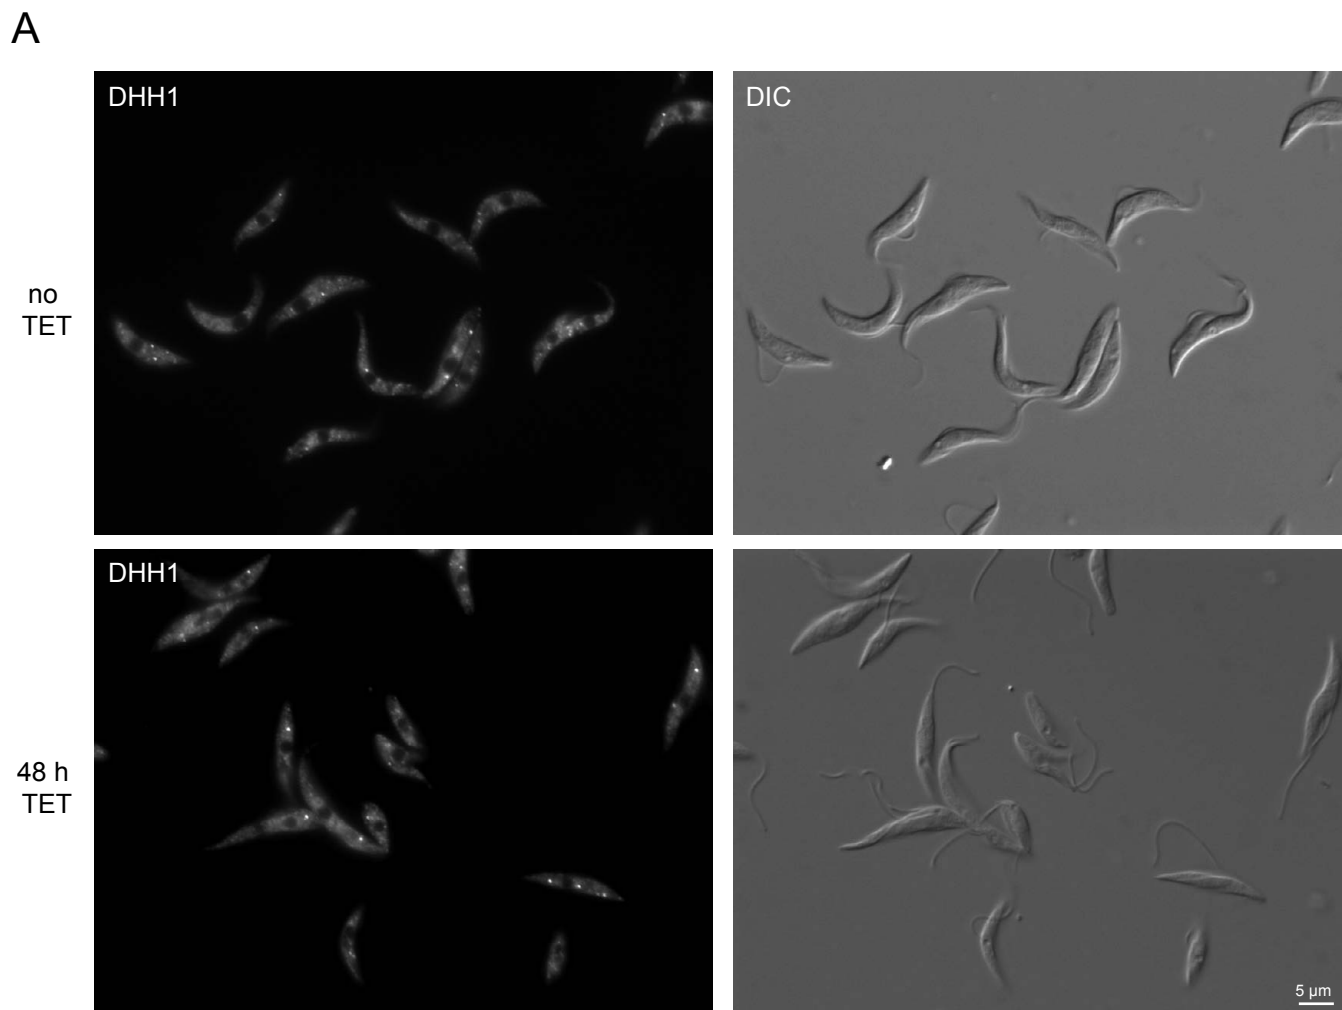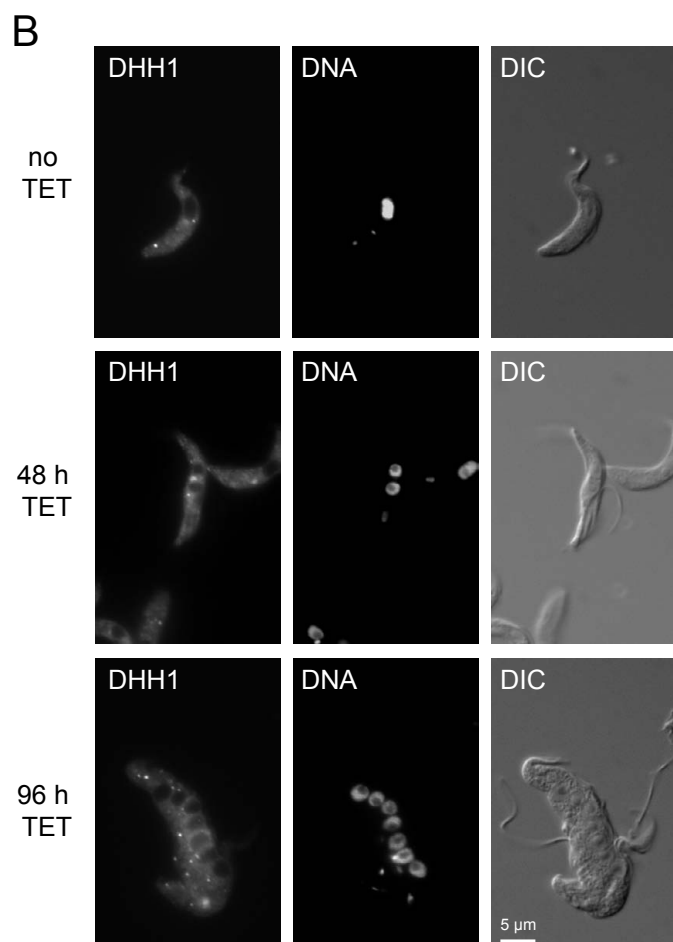

**Figure S9**  
**The decrease in P-bodies seen after SCD6 RNAi is unlikely to be caused by the RNAi process itself, as RNAi knock-down of two proteins, FLAI or Polo-like kinase, does not cause a decrease in P-bodies.**

eYFP-DHH1 localization to P-bodies was monitored following RNAi depletion of either **(A)** FLAI or **(B)** Polo-like kinase. FLAI depletion resulted in detached flagella as previously reported (La Count et al., 2002). Depletion of Polo-like-kinase caused an increase in 1K2N cells and at later time-points in multinuclear cells with usually a smaller number of kinetoplasts than nuclei due to a defect in kinetoplast division (Hammarton et al., 2007). Neither RNAi resulted in a decrease in P-bodies, but rather an increase.

**Table S1:** Details of all plasmids used in this work. All backbone plasmids are described in Kelly et al., 2007 or Sunter et al., 2012, although in some cases a different selectable marker was used, as indicated.

|                                       | Gene ID                              | nucleotides of ORF used for targeting / RNAi / expression | restriction enzyme used for linearization | backbone plasmid | expression vector | selectable marker |
|---------------------------------------|--------------------------------------|-----------------------------------------------------------|-------------------------------------------|------------------|-------------------|-------------------|
| SCD6-mChFP                            | Tb11.03.0530                         | 219- end                                                  | Sall                                      | p2705 with BSD   | p3378             | BSD               |
| SCD6-mChFP                            | Tb11.03.0530                         | 219- end                                                  | Sall                                      | p2705            | p2928             | NEO               |
| eYFP-DHH1                             | Tb927.10.3990                        | 1-466                                                     | Nhel                                      | p2675 with BSD   | p2829             | BSD               |
| mChFP-DHH1                            | Tb927.10.3990                        | 1-466                                                     | Nhel                                      | p2679 with BSD   | p2845             | BSD               |
| DRBD3-eYFP                            | Tb09.211.0560                        | 132- end                                                  | Bst11071                                  | p2710            | p3216             | NEO               |
| DRBD4-eYFP                            | Tb11.01.5690                         | 426- end                                                  | BamHI                                     | p2710            | p3217             | NEO               |
| CAF1-eYFP                             | Tb927.6.600                          | 153- end                                                  | Hpal                                      | p2710            | p3218             | NEO               |
| PABP2-eYFP                            | Tb09.211.2150                        | 539- end                                                  | XcmI                                      | p2710            | p3295             | NEO               |
| eIF4E1-eYFP                           | Tb11.18.0004                         | 162- end                                                  | Nrul                                      | p2710            | p3519             | NEO               |
| eIF4E2-eYFP                           | Tb927.10.16070                       | 114- end                                                  | SexAI                                     | p2710            | p3520             | NEO               |
| eIF4E3-eYFP                           | Tb11.01.3630                         | 249- end                                                  | BlpI                                      | p2710            | p3521             | NEO               |
| eIF4E4-eYFP                           | Tb927.6.1870                         | 361- end                                                  | BspEI                                     | p2710            | p3522             | NEO               |
| CBP20-eYFP                            | Tb927.6.1970                         | 112- end                                                  | Eco47III                                  | p2710            | p3523             | NEO               |
| eYFP-CGM1                             | Tb927.7.2080                         | 1- 923                                                    | EcoRI                                     | p2675            | p3524             | PURO              |
| XPO1-eYFP                             | Tb11.01.5940                         | 1841- end                                                 | AvaI                                      | p2710            | p3527             | NEO               |
| eIF4G3-eYFP                           | Tb927.8.4820                         | 1319- end                                                 | BbsI                                      | p2710            | p3549             | NEO               |
| MEX67-eYFP                            | Tb11.22.0004                         | 683- end                                                  | Nhel                                      | p2710            | p3595             | NEO               |
| Nup62-eYFP                            | Tb927.4.5200                         | 1659- end                                                 | EcoNI                                     | p2710            | p3596             | NEO               |
| Nup62-eYFP                            | Tb927.4.5200                         | 1659- end                                                 | EcoNI                                     | p2710 with HYG   | p4063             | HYG               |
| Nup96-eYFP                            | Tb927.10.7060                        | 1691- end                                                 | BsmI                                      | p2710            | p3597             | NEO               |
| Ran-binding protein 1-eYFP (putative) | Tb11.02.0870                         | 232-end                                                   | AvaI                                      | p2710            | p4090             | NEO               |
| VASA-eYFP                             | Tb927.10.14550                       | 1298- end                                                 | SfiI                                      | p2710            | p3675             | NEO               |
| XRNA-eYFP                             | Tb927.7.4900                         | 3579- end                                                 | Nhel                                      | p2710            | p3043             | NEO               |
| PABP1-eYFP                            | Tb09.211.0930                        | 123- end                                                  | NsiI                                      | p2710 with HYG   | p2949             | HYG               |
| UPF1-eYFP                             | Tb927.5.2140                         | 1704-end                                                  | BlpI                                      | p2710 with HYG   | P4181             | HYG               |
| Lsm5-eYFP                             | Tb927.6.4340                         | full length (inducible expression)                        | NotI                                      | p2663            | p2741             | HYG               |
| SmE-eYFP                              | Tb927.6.2700                         | full length                                               | PshAI                                     | p2710            | p3871             | NEO               |
| SmE RNAi                              | Tb927.6.2700                         | full length                                               | NotI                                      | p3666            | p3872             | BSD               |
| SCD6 RNAi                             | Tb11.03.0530                         | 219-end                                                   | NotI                                      | p3666            | p3996             | BSD               |
| NUP158 RNAi                           | Tb11.03.0140                         | 1659-2148                                                 | NotI                                      | p3666            | p4220             | BSD               |
| SCD6 inducible overexpression         | Tb11.03.0530                         | full length                                               | NotI                                      | p3888            | p3924             | BSD               |
| FlA1 RNAi                             | as described in LaCount et al., 2002 |                                                           |                                           |                  |                   |                   |
